# Supplementary material for: Effect of nanoclay orientation on oxygen barrier properties of LbL nanocomposite coated films
Source: Royal Society of Chemistry journal article supplement (doi:10.1039/c8ra09522a), 2019-01-01
Supplement: c8ra09522a1.pdf [file c8ra09522a1.pdf]

## Supporting information

### Effect of Nanoclay Orientation on Oxygen Barrier Properties of LbL Nanocomposite Coated Films

Fatma Ben Dhieb<sup>1</sup>, Ebrahim Jalali Dil<sup>1</sup>, Seyyed H. Tabatabaei<sup>2</sup>, Frej Mighri<sup>3</sup> and Abdellah Ajji<sup>1\*</sup>

<sup>1</sup> 3SPack NSERC-Industry Chair, CREPEC, Chemical Engineering Department, Polytechnique  
Montreal, C.P. 6079, Succ. Centre ville, Montreal, QC, Canada H3C 3A7

<sup>2</sup> ProAmpac, Terrebonne, QC, Canada J6Y 1V2

<sup>3</sup> CREPEC, Chemical Engineering Department, Laval University, Quebec, QC, Canada

(\*) All correspondence should be addressed to: [abdellah.ajji@polymtl.ca](mailto:abdellah.ajji@polymtl.ca)

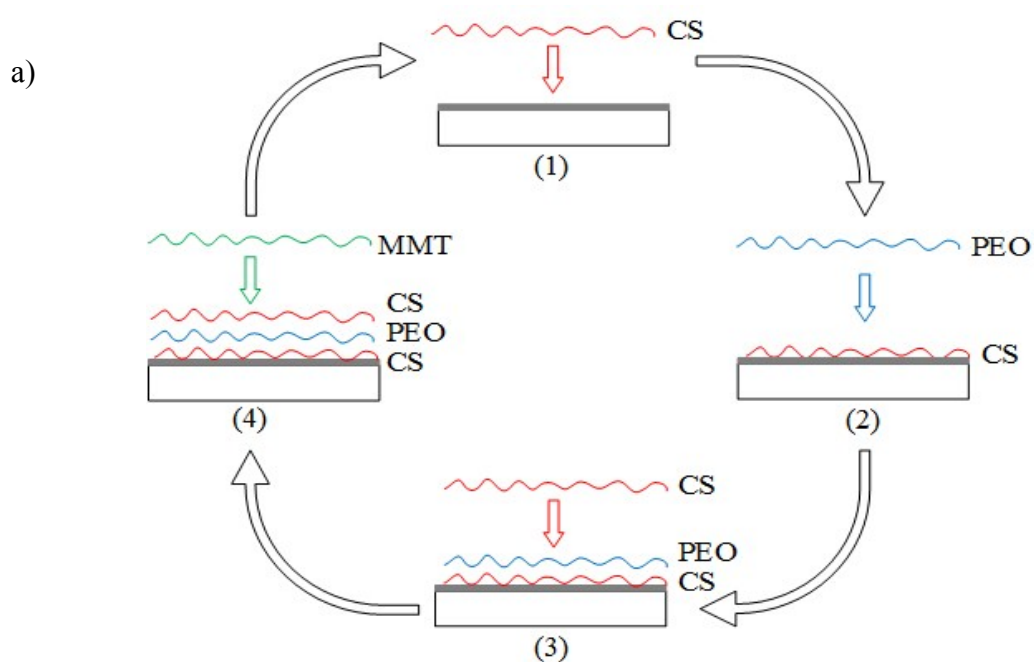

b)

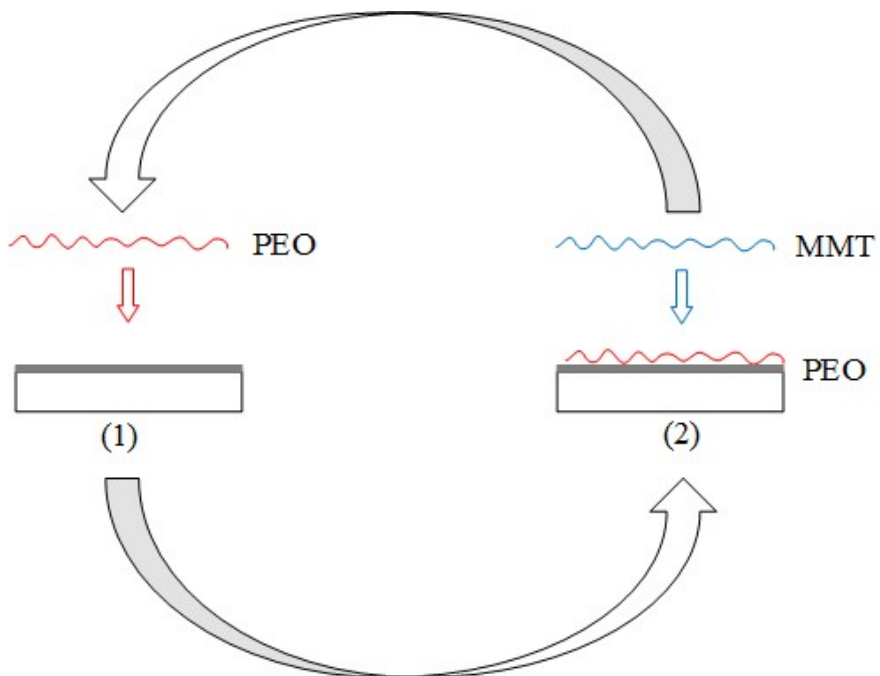

FigureS1: Steps of the deposition of a) one quadlayer chitosan/PEO/chitosan/MMT and b) one bilayer PEO/MMT

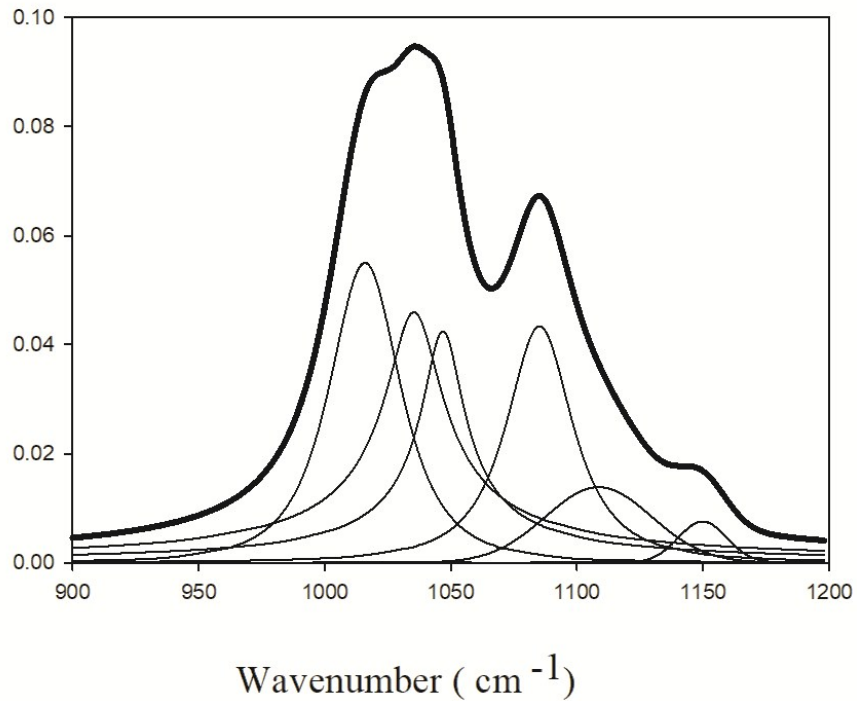

Figure S2: Typical peak deconvolution of the S<sub>0</sub> spectrum for a PVA quadlayers

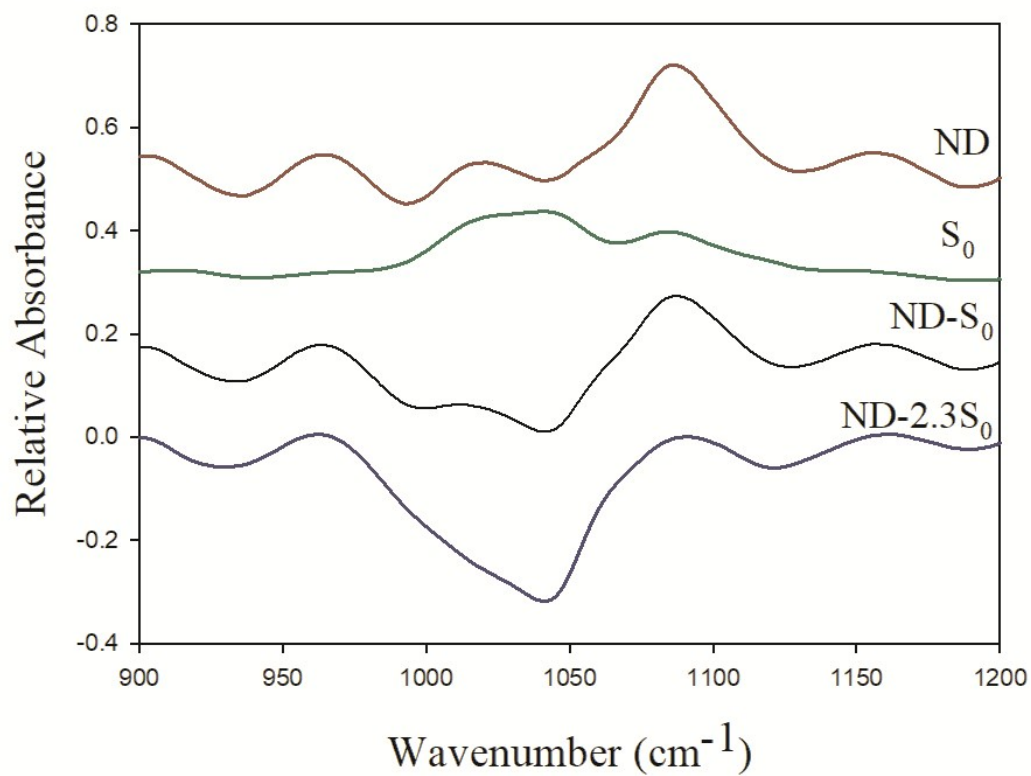

Figure S3: Peak subtraction for a PVP quadlayers

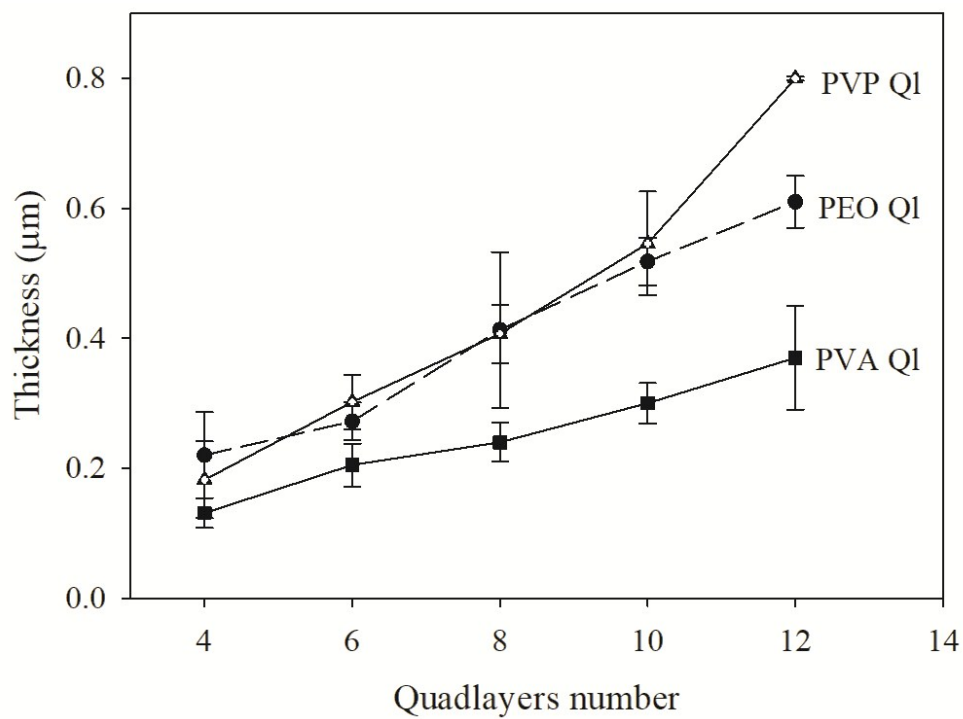

FigureS4: thickness variation with the number of layers for the three assemblies

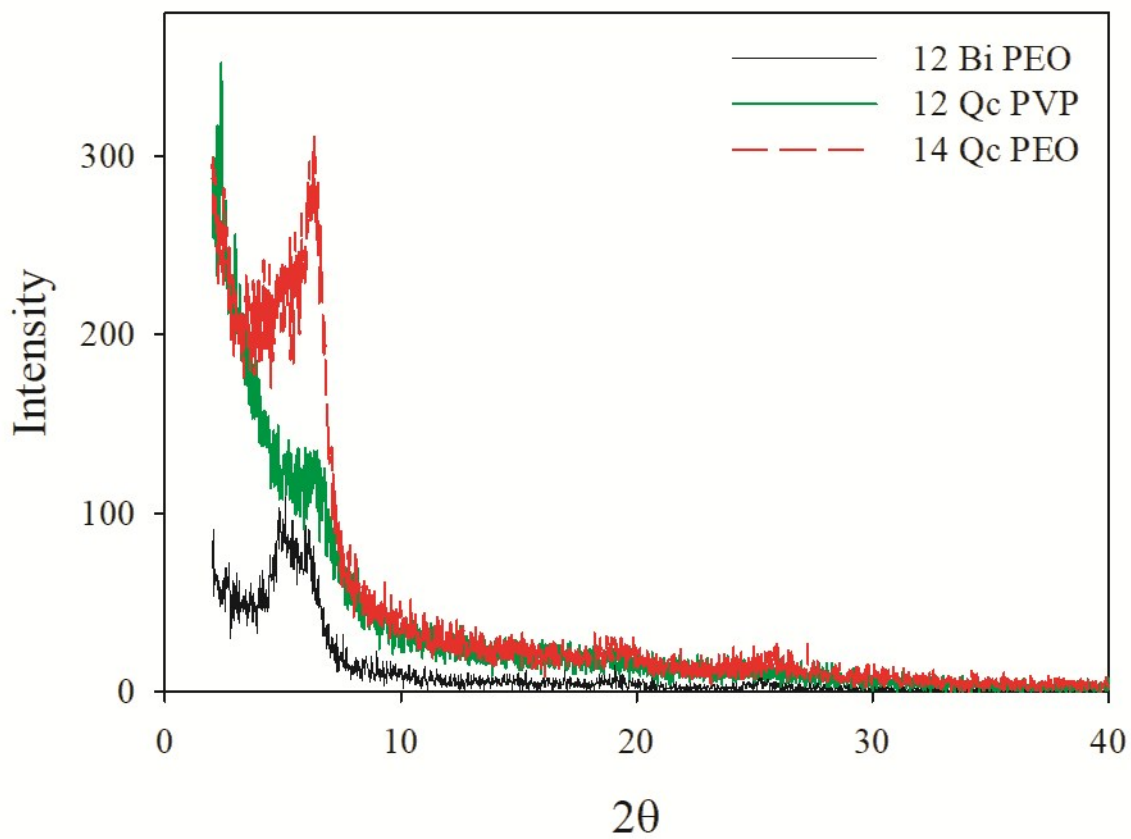

Figure S5: XRD patterns of three of the studied assemblies
